# Supplementary material
Source: PubMed Central journal article supplement (PMC10126939)
Supplement: jamaneurol-e230742-s001.pdf [file jamaneurol-e230742-s001.pdf]

## Data Sharing Statement

Andres. Trends in the Prevalence of Stroke Among Community-Dwelling Individuals in the US, 1999-2018. *JAMA Neurol.* Published April 24, 2023. doi:10.1001/jamaneurol.2023.0742

### Data

**Data available:** Yes

**Data types:** Other (please specify)

**Additional Information:** All NHANES data is publicly available:

<https://www.cdc.gov/nchs/nhanes/Default.aspx>

**How to access data:** All NHANES data is publicly available:

<https://www.cdc.gov/nchs/nhanes/Default.aspx>

**When available:** With publication

### Supporting Documents

**Document types:** None

### Additional Information

**Who can access the data:** All NHANES data is publicly available:

<https://www.cdc.gov/nchs/nhanes/Default.aspx>

**Types of analyses:** All NHANES data is publicly available:

<https://www.cdc.gov/nchs/nhanes/Default.aspx>

**Mechanisms of data availability:** All NHANES data is publicly available:

<https://www.cdc.gov/nchs/nhanes/Default.aspx>

**Any additional restrictions:** N/A
